# Supplementary material for: Genome-wide association analysis reveals genetic variations and candidate genes associated with salt tolerance related traits in Gossypium hirsutum
Source: BMC Genomics. 2021 Jan 6;22:26. doi: 10.1186/s12864-020-07321-3 (PMC7789578; doi:10.1186/s12864-020-07321-3)
Supplement: Supplementary file 4 — Additional file 4: Table S3. One hundred fifty-six potential candidate genes within 100 kb of flanking significant markers [file 12864_2020_7321_MOESM4_ESM.xlsx]

## Sheet: Sheet1
Table S4 156 potential candidate genes within 100 Kb of flanking significant markers
Chr.	Gene	Gene expression	Trait	Annotation
A05	GH_A05G3644		RSDW16	Cytochrome c oxidase subunit 6b-2
A05	GH_A05G3645		RSDW16	Transposon Ty3-G Gag-Pol polyprotein
A05	GH_A05G3646		RSDW16	Tetratricopeptide repeat protein 1
A05	GH_A05G3647		RSDW16	Putative clathrin assembly protein
A07	GH_A07G2207		RSFW16, RSFW17	no
A07	GH_A07G2208	Up-regulated in Miscot7913-83	RSFW16, RSFW17	Subtilisin-like protease SBT5.3
A07	GH_A07G2209		RSFW16, RSFW17	Ras-related protein RABB1c
A07	GH_A07G2210		RSFW16, RSFW17	Glucose-1-phosphate adenylyltransferase small subunit 2, chloroplastic
A07	GH_A07G2211		RSFW16, RSFW17	no
A07	GH_A07G2212		RSFW16, RSFW17	no
A07	GH_A07G2213		RSFW16, RSFW17	Myb family transcription factor APL
A07	GH_A07G2214		RSFW16, RSFW17	Transmembrane 9 superfamily member 12
A07	GH_A07G2215		RSFW16, RSFW17	no
A07	GH_A07G2216		RSFW16, RSFW17, RPH17	Auxilin-related protein 1
A07	GH_A07G2217		RSFW16, RSFW17, RPH17	60S ribosomal protein L5
A07	GH_A07G2218		RSFW16, RSFW17, RPH17	Ribonuclease 2
A07	GH_A07G2219		RSFW16, RSFW17, RPH17	Mediator of RNA polymerase II transcription subunit 19a
A07	GH_A07G2220		RSFW16, RSFW17, RPH17	Acyl-coenzyme A thioesterase 9, mitochondrial
A07	GH_A07G2221		RSFW16, RSFW17, RPH17	UDP-glycosyltransferase 74F2
A07	GH_A07G2222		RSFW16, RSFW17, RPH17	Probably inactive leucine-rich repeat receptor-like protein kinase At5g48380
A07	GH_A07G2223		RSFW16, RSFW17, RPH17	FRIGIDA-like protein 3
A07	GH_A07G2224		RSFW16, RSFW17, RPH17	Ubiquitin-like-conjugating enzyme ATG10
A07	GH_A07G2225		RSFW16, RSFW17, RPH17	Glutamate receptor 2.7
A07	GH_A07G2226		RSFW16, RSFW17, RPH17	Glutamate receptor 1.3
A07	GH_A07G2227		RSFW16, RSFW17, RPH17	no
A07	GH_A07G2228		RSFW16, RSFW17, RPH17	Protein FAR1-RELATED SEQUENCE 5
A07	GH_A07G2229		RSFW16, RSFW17, RPH17	Calmodulin-like protein 7
A07	GH_A07G2230		RSFW16, RSFW17, RPH17	Probable linoleate 9S-lipoxygenase 4
A07	GH_A07G2231		RSFW16, RSFW17, RPH17	Uncharacterized protein
A07	GH_A07G2232		RSFW16, RSFW17, RPH17	Probable sodium/metabolite cotransporter BASS3, chloroplastic
A07	GH_A07G2233	Down-regulated in Miscot7913-83	RSFW16, RSFW17, RPH17	no
A08	GH_A08G0481		RSFW16, RSDW16	Zinc finger CCCH domain-containing protein 32
A08	GH_A08G0482		RSFW16, RSDW16	no
A08	GH_A08G0483		RSFW16, RSDW16	Protein TRANSPORT INHIBITOR RESPONSE 1
A08	GH_A08G0484		RSFW16, RSDW16	U1 small nuclear ribonucleoprotein C
A08	GH_A08G0485		RSFW16, RSDW16	no
A08	GH_A08G0486		RSFW16, RSDW16	no
A08	GH_A08G0487		RSFW16, RSDW16	no
A08	GH_A08G0488	Up-regulated in Miscot7913-83	RSFW16, RSDW16	LRR receptor-like serine/threonine-protein kinase GSO2
A08	GH_A08G0489		RSFW16, RSDW16	Mitochondrial substrate carrier family protein ucpB
A08	GH_A08G0490		RSDW16	Histone H2AX
A08	GH_A08G0491		RSDW16	Serine/threonine-protein phosphatase BSL1
A08	GH_A08G0492		RSDW16	Mitochondrial ubiquitin ligase activator of NFKB 1
A08	GH_A08G0493		RSDW16	Cyclin-B1-2
A08	GH_A08G0494	Down-regulated in Miscot7913-83	RSDW16	no
A08	GH_A08G0495		RSDW16	BTB/POZ and MATH domain-containing protein 2
A08	GH_A08G0496		RSDW16	Mediator of RNA polymerase II transcription subunit 33B
A08	GH_A08G0532		RSDW16, RSDW17	Putative G3BP-like protein
A08	GH_A08G0533		RSDW16, RSDW17	40S ribosomal protein S14
A08	GH_A08G0534		RSDW16, RSDW17	40S ribosomal protein S8
A08	GH_A08G0535		RSDW16, RSDW17	Linoleate 9S-lipoxygenase 5, chloroplastic
A08	GH_A08G0536		RSDW16, RSDW17	Probable sodium/metabolite cotransporter BASS3, chloroplastic
A08	GH_A08G0537		RSDW16, RSDW17	40S ribosomal protein S8
A08	GH_A08G0538		RSDW16, RSDW17	Probable sodium/metabolite cotransporter BASS3, chloroplastic
A08	GH_A08G0539		RSDW16, RSDW17	Linoleate 9S-lipoxygenase 5, chloroplastic
A08	GH_A08G0540		RSDW16, RSDW17	Probable sodium/metabolite cotransporter BASS3, chloroplastic
A08	GH_A08G0541		RSDW16, RSDW17	Linoleate 9S-lipoxygenase 5, chloroplastic
A08	GH_A08G0542		RSDW16, RSDW17	Rhodanese-like domain-containing protein 4A, chloroplastic
A08	GH_A08G0543		RSDW16, RSDW17	Mediator of RNA polymerase II transcription subunit 19a
A08	GH_A08G0544	Up-regulated in Miscot7913-83	RSDW16, RSDW17	60S ribosomal protein L5
A08	GH_A08G0545		RSDW16, RSDW17	no
A08	GH_A08G0546		RSDW16, RSDW17	Flowering time control protein FPA
A08	GH_A08G0547		RSDW16, RSDW17	no
A08	GH_A08G0999		RSFW17	3-hydroxyisobutyryl-CoA hydrolase 1
A08	GH_A08G1000		RSFW17	DAR GTPase 2, mitochondrial
A08	GH_A08G1001		RSFW17	no
A09	GH_A09G1052		RPH17	Protein argonaute 5
A09	GH_A09G1053		RPH17	Aspartic proteinase-like protein 2
A09	GH_A09G1054		RPH17	Lysosomal Pro-X carboxypeptidase
A10	GH_A10G1617		RPH16, RSFW16	U-box domain-containing protein 16
A10	GH_A10G1618		RPH16, RSFW16	ovate family protein 2
A10	GH_A10G1619		RPH16, RSFW16	no
A10	GH_A10G1620	Up-regulated in Miscot7913-83	RPH16, RSFW16	Probable serine/threonine-protein kinase WNK5
A10	GH_A10G1621		RPH16, RSFW16	no
A11	GH_A11G3458		RSFW17	Protein EXORDIUM-like 6
A11	GH_A11G3459		RSFW17	no
A11	GH_A11G3460		RSFW17	FAS1 domain-containing protein SELMODRAFT_448915
A11	GH_A11G3461		RSFW17	ADP-ribosylation factor
A11	GH_A11G3462		RSFW17	CLAVATA3/ESR (CLE)-related protein 1
A11	GH_A11G3463		RSFW17	no
A11	GH_A11G3464		RSFW17	CLAVATA3/ESR (CLE)-related protein 1
A11	GH_A11G3465	Up-regulated in Miscot7913-83	RSFW17	Beta-amylase
A11	GH_A11G3466		RSFW17	no
A11	GH_A11G3467		RSFW17	no
A11	GH_A11G3468		RSFW17	no
A11	GH_A11G3469		RSFW17	no
A11	GH_A11G3470		RSFW17	Serine/threonine-protein kinase At3g07070
A11	GH_A11G3471		RSFW17	CBS domain-containing protein CBSX6
A11	GH_A11G3472		RSFW17	Beta-glucosidase 42
A11	GH_A11G3473		RSFW17	Putative ribonuclease H protein At1g65750
A11	GH_A11G3474		RSFW17	Acyl-CoA-binding protein
A11	GH_A11G3475		RSFW17	Acyl-CoA-binding protein
A11	GH_A11G3476		RSFW17	Plastid division protein CDP1, chloroplastic
A11	GH_A11G3477		RSFW17	GDT1-like protein 3
A11	GH_A11G3478		RSFW17	3-oxoacyl-[acyl-carrier-protein] synthase II, chloroplastic
A12	GH_A12G1086		RPH17	no
A13	GH_A13G0159		RPH16, RPH17	B3 domain-containing transcription factor NGA4
A13	GH_A13G0160		RPH16, RPH17	GDSL esterase/lipase CPRD49
A13	GH_A13G0161		RPH16, RPH17	no
A13	GH_A13G0162	Down-regulated in Miscot7913-83	RPH16, RPH17	Pyruvate decarboxylase 2
A13	GH_A13G0163		RPH16, RPH17	High mobility group B protein 1
A13	GH_A13G0164		RPH16, RPH17	Protein yippee-like
A13	GH_A13G0165		RPH16, RPH17	Auxin transporter-like protein 2
A13	GH_A13G0166		RPH16, RPH17	60S acidic ribosomal protein P0-1
A13	GH_A13G0167		RPH16, RPH17	NAD(P)H-quinone oxidoreductase subunit N, chloroplastic
A13	GH_A13G0168	Up-regulated in Miscot7913-83	RPH16, RPH17	Nematode resistance protein-like HSPRO2
A13	GH_A13G0169		RPH16, RPH17	Cytochrome P450 714C2
A13	GH_A13G0170		RPH16, RPH17	Cytochrome P450 714A1
A13	GH_A13G0171	Up-regulated in Miscot7913-83	RPH16, RPH17	Probable aquaporin PIP-type 7a
A13	GH_A13G0172		RPH16, RPH17	Eukaryotic translation initiation factor 3 subunit F
A13	GH_A13G0173		RPH16, RPH17	no
A13	GH_A13G0174		RPH16, RPH17	Probable signal peptidase complex subunit 2
A13	GH_A13G0175		RPH16, RPH17	Glucan endo-1,3-beta-glucosidase 2
A13	GH_A13G0176		RPH16, RPH17	LIM domain-containing protein WLIM2b
A13	GH_A13G0177		RPH16, RPH17	Probable sugar phosphate/phosphate translocator At3g11320 OS=Arabidopsis thaliana GN=At3g11320 PE=2 SV=1
A13	GH_A13G0178		RPH16, RPH17	Uncharacterized protein
A13	GH_A13G0179		RPH16, RPH17	Immediate early response 3-interacting protein 1
A13	GH_A13G0180		RPH16, RPH17	L-type lectin-domain containing receptor kinase VIII.2
A13	GH_A13G0181		RPH16, RPH17	Putative ribonuclease H protein At1g65750
A13	GH_A13G0182		RPH16, RPH17	no
A13	GH_A13G0183		RPH16, RPH17	Protein GUCD1
A13	GH_A13G0184		RPH16, RPH17	2-alkenal reductase (NADP(+)-dependent)
A13	GH_A13G0977		RSDW16, RSDW17	Auxin-responsive protein SAUR21
A13	GH_A13G0978		RSDW16, RSDW17	Indole-3-acetic acid-induced protein ARG7
A13	GH_A13G0979		RSDW16, RSDW17	Auxin-responsive protein SAUR23
A13	GH_A13G0980		RSDW16, RSDW17	Auxin-induced protein X15
D02	GH_D02G1278		RPH17	50S ribosomal protein L14, chloroplastic
D02	GH_D02G1279		RPH17	30S ribosomal protein S3, chloroplastic
D02	GH_D02G1280		RPH17	Protein Ycf2
D02	GH_D02G1281		RPH17	no
D02	GH_D02G1282		RPH17	no
D02	GH_D02G1283		RPH17	Probable boron transporter 2
D03	GH_D03G0703		RPH17	no
D03	GH_D03G0704		RPH17	Wall-associated receptor kinase 2
D03	GH_D03G0705		RPH17	no
D08	GH_D08G1461		RSDW16	Putative ribonuclease H protein
D08	GH_D08G1462		RSDW16	no
D08	GH_D08G1463		RSDW16	no
D08	GH_D08G1464		RSDW16	no
D08	GH_D08G1465		RSDW16	Golgi apparatus membrane protein-like protein ECHIDNA
D08	GH_D08G1466		RSDW16	no
D08	GH_D08G1467		RSDW16	ADP-ribosylation factor 2
D08	GH_D08G1468	Up-regulated in Miscot7913-83	RSDW16	GDSL esterase/lipase At3g62280
D08	GH_D08G1469		RSDW16	Probable boron transporter 2
D08	GH_D08G1470		RSDW16	no
D08	GH_D08G1471		RSDW16	no
D08	GH_D08G1496		RSDW16	no
D08	GH_D08G1497		RSDW16	ADP-ribosylation factor 1
D08	GH_D08G1498		RSDW16	no
D08	GH_D08G1499		RSDW16	no
D08	GH_D08G1500		RSDW16	Uncharacterized calcium-binding protein At1g02270
D08	GH_D08G1501		RSDW16	no
D08	GH_D08G1506		RSDW16	no
D08	GH_D08G1507		RPH16, RPH17, RSDW16	Rho GTPase-activating protein 3
D08	GH_D08G1508	Up-regulated in Miscot7913-83	RPH16, RPH17, RSDW16	Auxin-responsive protein SAUR32
D08	GH_D08G1509		RPH16, RPH17, RSDW16	no
